# Supplementary material for: Anti-Inflammatory and Antioxidant Effects of Leaves and Sheath from Bamboo (Phyllostacys edulis J. Houz)
Source: MDPI journal article supplement (doi:10.3390/antiox12061239), 2023-06-08
Supplement: s1 [file s1]

Supplementary Materials

Table S1. UHPLC gradient elution.

|   | Time (min) | A (%) | B (%) | Flow (mL/min) |
|---|------------|-------|-------|---------------|
| 1 | Initial    | 95    | 5     | 0.40          |
| 2 | 3.00       | 95    | 5     | 0.40          |
| 3 | 17.00      | 40    | 60    | 0.40          |
| 4 | 17.50      | 0     | 100   | 0.40          |
| 5 | 20.00      | 95    | 5     | 0.40          |
| 6 | 21.00      | 95    | 5     | 0.40          |

A: H<sub>2</sub>O (pH 3.10 with acetic acid); B: CH<sub>3</sub>CN

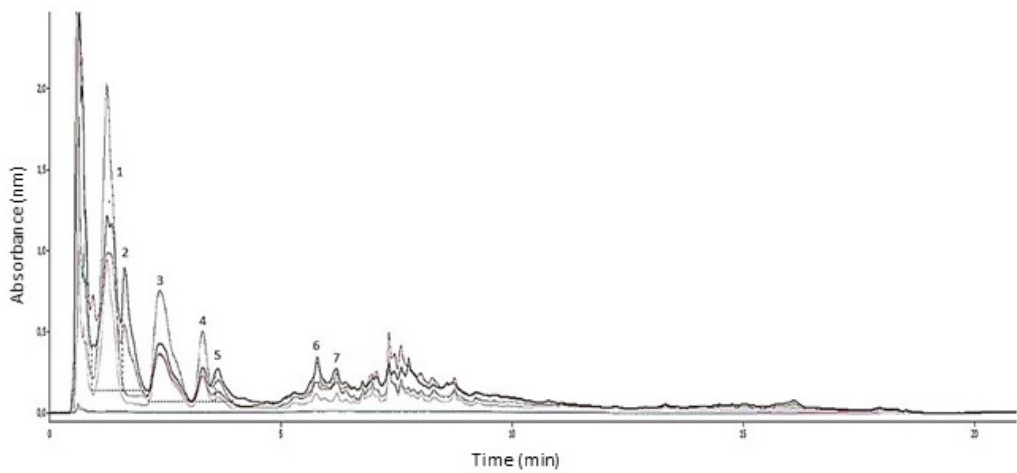

Figure S1. Chromatographic profile of bamboo sheath: 1 gallic acid; 2 protocatechuic acid; 3 chlorogenic acid; 4 caffeic acid; 5 *p*-coumaric acid; 6 ferulic acid; 7 rutin.

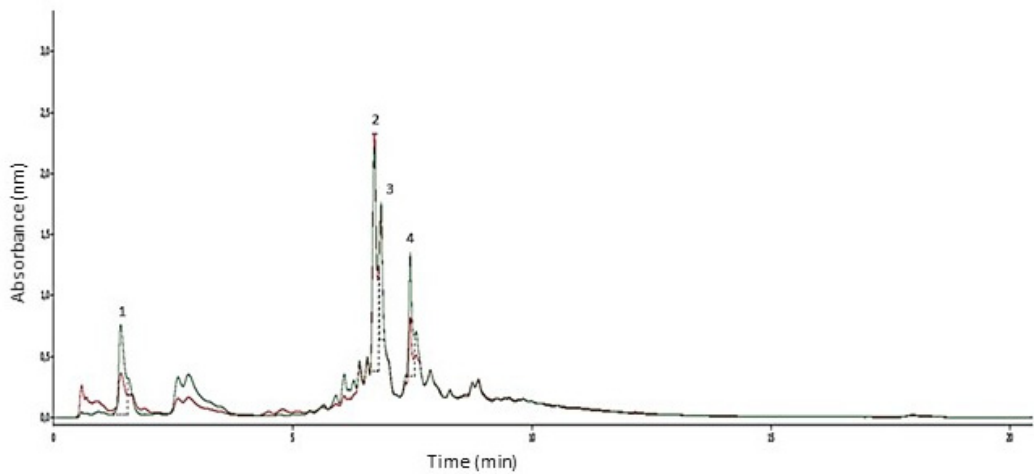

Figure S2. Chromatographic profile of bamboo leaves: 1 protocatechuic acid; 2 isoorientin; 3 orientin; 4 isovitexin.
